# Supplementary material
Source: publisher figshare collection journal article supplement (https://sage.figshare.com/ndownloader/files/16120586)
Supplement: Supplementary file 1 [file 16120586]

## Appendix 1: Methodological Quality assessment Criteria

|                                                                                                   |                                                                                                                                                                                                 |                          |                          |                          |
|---------------------------------------------------------------------------------------------------|-------------------------------------------------------------------------------------------------------------------------------------------------------------------------------------------------|--------------------------|--------------------------|--------------------------|
| Reviewer 1                                                                                        |                                                                                                                                                                                                 |                          |                          |                          |
| Reviewer 2                                                                                        |                                                                                                                                                                                                 |                          |                          |                          |
| Author (s)                                                                                        |                                                                                                                                                                                                 |                          |                          |                          |
| Methods                                                                                           |                                                                                                                                                                                                 |                          |                          |                          |
| Study design                                                                                      |                                                                                                                                                                                                 |                          |                          |                          |
| Data                                                                                              |                                                                                                                                                                                                 |                          |                          |                          |
| Sampling                                                                                          |                                                                                                                                                                                                 |                          |                          |                          |
| Analysis                                                                                          |                                                                                                                                                                                                 |                          |                          |                          |
| Types of Study                                                                                    | Methodological Quality assessment Criteria                                                                                                                                                      | Yes                      | No                       | Cant tell                |
| Screening Questions (for all types)                                                               | Are there clear research questions or objectives?                                                                                                                                               | <input type="checkbox"/> | <input type="checkbox"/> | <input type="checkbox"/> |
|                                                                                                   | Do the collected data address the research question?                                                                                                                                            | <input type="checkbox"/> | <input type="checkbox"/> | <input type="checkbox"/> |
|                                                                                                   | <i>Further appraisal is not feasible when the answer is 'No' or 'Can't tell' to one or both screening questions</i>                                                                             |                          |                          |                          |
| Qualitative                                                                                       | 1.1 Is there congruity between the stated philosophical perspective and the research methodology?                                                                                               | <input type="checkbox"/> | <input type="checkbox"/> | <input type="checkbox"/> |
|                                                                                                   | 1.2 Are the sources of qualitative data (archives, documents, informants, observations) relevant to address the research question?                                                              | <input type="checkbox"/> | <input type="checkbox"/> | <input type="checkbox"/> |
|                                                                                                   | 1.3 Is the process for analysing qualitative data relevant to address the research question?                                                                                                    | <input type="checkbox"/> | <input type="checkbox"/> | <input type="checkbox"/> |
|                                                                                                   | 1.4 Are participants, and their voices, adequately represented? (adequate quotes and text been used to represent the concept discussed)                                                         | <input type="checkbox"/> | <input type="checkbox"/> | <input type="checkbox"/> |
|                                                                                                   | 1.5 Is there a statement locating the researcher culturally or theoretically? (Are the beliefs and values, and their potential influence on the study declared?)                                | <input type="checkbox"/> | <input type="checkbox"/> | <input type="checkbox"/> |
|                                                                                                   | 1.6. Is the influence of the researcher on the research, and vice-versa, addressed? ( <i>Addressing the potential for the researcher to either influence or to be influenced by the study</i> ) | <input type="checkbox"/> | <input type="checkbox"/> | <input type="checkbox"/> |
|                                                                                                   | 1.7. Do the conclusions drawn in the research report flow from the analysis, or interpretation, of the data?                                                                                    | <input type="checkbox"/> | <input type="checkbox"/> | <input type="checkbox"/> |
|                                                                                                   | 1.8. Is the ethical issues adequately addressed? ( <i>statement indicating appropriate ethics approval</i> )                                                                                    | <input type="checkbox"/> | <input type="checkbox"/> | <input type="checkbox"/> |
| Quantitative randomized controlled (trials)                                                       | 2.1. Is there a clear description of the randomization (or an appropriate sequence generation)?                                                                                                 | <input type="checkbox"/> | <input type="checkbox"/> | <input type="checkbox"/> |
|                                                                                                   | 2.2. Is there a clear description of the allocation concealment or blinding when applicable)?                                                                                                   | <input type="checkbox"/> | <input type="checkbox"/> | <input type="checkbox"/> |
|                                                                                                   | 2.3. Are there complete outcome data (80% or above)?                                                                                                                                            | <input type="checkbox"/> | <input type="checkbox"/> | <input type="checkbox"/> |
|                                                                                                   | 2.4. Is there low withdrawal/drop-out (below 20%)?                                                                                                                                              | <input type="checkbox"/> | <input type="checkbox"/> | <input type="checkbox"/> |
| Quantitative non-randomized<br><br>(Cohort study, case-control study, analytical cross-sectional) | 3.1. Are participants recruited in a way that minimizes selection bias?                                                                                                                         | <input type="checkbox"/> | <input type="checkbox"/> | <input type="checkbox"/> |
|                                                                                                   | 3.2 Were the criteria for inclusion in the sample clearly defined?                                                                                                                              | <input type="checkbox"/> | <input type="checkbox"/> | <input type="checkbox"/> |
|                                                                                                   | 3.3 Were the study subjects and the setting described in detail?                                                                                                                                | <input type="checkbox"/> | <input type="checkbox"/> | <input type="checkbox"/> |
|                                                                                                   | 3.4 Were objective, standard criteria used for measurement of the condition?                                                                                                                    | <input type="checkbox"/> | <input type="checkbox"/> | <input type="checkbox"/> |
|                                                                                                   | 3.5 Were the outcomes measured in a valid and reliable way?                                                                                                                                     | <input type="checkbox"/> | <input type="checkbox"/> | <input type="checkbox"/> |
|                                                                                                   | 3.6 Was appropriate statistical analysis used?                                                                                                                                                  | <input type="checkbox"/> | <input type="checkbox"/> | <input type="checkbox"/> |
|                                                                                                   | 3.7 Is the ethical issues adequately addressed? ( <i>statement indicating appropriate ethics approval</i> )                                                                                     | <input type="checkbox"/> | <input type="checkbox"/> | <input type="checkbox"/> |
|                                                                                                   | 3.8 Do the conclusions drawn in the research report flow from the analysis, or interpretation, of the data?                                                                                     | <input type="checkbox"/> | <input type="checkbox"/> | <input type="checkbox"/> |
|                                                                                                   | 3.9 Are measurements appropriate (clear origin, or validity known, or standard instrument; and absence of contamination between                                                                 | <input type="checkbox"/> | <input type="checkbox"/> | <input type="checkbox"/> |

|                                 |                                                                                                                                                                                                                                         |                                                                                                                         |                          |                          |
|---------------------------------|-----------------------------------------------------------------------------------------------------------------------------------------------------------------------------------------------------------------------------------------|-------------------------------------------------------------------------------------------------------------------------|--------------------------|--------------------------|
|                                 | groups when appropriate) regarding the exposure/intervention and outcomes?                                                                                                                                                              |                                                                                                                         |                          |                          |
|                                 | 3.11 In the groups being compared (exposed vs. non-exposed; with intervention vs. without; cases vs. controls), are the participants comparable, or do researchers take into account (control for) the difference between these groups? | <input type="checkbox"/>                                                                                                | <input type="checkbox"/> | <input type="checkbox"/> |
|                                 | 3.12 Are there complete outcome data (80% or above), and, when applicable, an acceptable response rate (60% or above), or an acceptable follow-up rate for cohort studies (depending on the duration of follow-up)?                     | <input type="checkbox"/>                                                                                                | <input type="checkbox"/> | <input type="checkbox"/> |
| <b>Quantitative descriptive</b> | 4.1. Is the sampling strategy relevant to address the quantitative research question (quantitative aspect of the mixed methods question)?                                                                                               | <input type="checkbox"/>                                                                                                | <input type="checkbox"/> | <input type="checkbox"/> |
|                                 | 4.2. Is the sample representative of the population under study?                                                                                                                                                                        | <input type="checkbox"/>                                                                                                | <input type="checkbox"/> | <input type="checkbox"/> |
|                                 | 4.3. Are measurements appropriate (clear origin, or validity known, or standard instrument)?                                                                                                                                            | <input type="checkbox"/>                                                                                                | <input type="checkbox"/> | <input type="checkbox"/> |
|                                 | 4.4. Is there an acceptable response rate (60% or above)?                                                                                                                                                                               | <input type="checkbox"/>                                                                                                | <input type="checkbox"/> | <input type="checkbox"/> |
| <b>Mixed methods</b>            | 5.1. Is the mixed methods research design relevant to address the qualitative and quantitative research questions, or the qualitative and quantitative aspects of the mixed methods question?                                           | <input type="checkbox"/>                                                                                                | <input type="checkbox"/> | <input type="checkbox"/> |
|                                 | 5.2. Is the integration of qualitative and quantitative data (or results relevant to address the research question?                                                                                                                     | <input type="checkbox"/>                                                                                                | <input type="checkbox"/> | <input type="checkbox"/> |
|                                 | 5.3. Is appropriate consideration given to the limitations associated with this integration, e.g., the divergence of qualitative and quantitative data in a triangulation design?                                                       | <input type="checkbox"/>                                                                                                | <input type="checkbox"/> | <input type="checkbox"/> |
|                                 | <i>Apply the criteria use for qualitative data for the qualitative component and quantitative component respectively.</i>                                                                                                               |                                                                                                                         |                          |                          |
| <b>Overall Quality Score</b>    | Comments on score:                                                                                                                                                                                                                      | <input type="checkbox"/> Low (25%)<br><input type="checkbox"/> Medium (50%)<br><input type="checkbox"/> High 75% - 100% |                          |                          |
| <b>Reviewer 2</b>               | Comments:                                                                                                                                                                                                                               |                                                                                                                         |                          |                          |

#### **NB: Scoring metrics**

*The score can be computed by counting the total number of “yes” and expressing them as a percentage ie below 25% represent Low Quality, 50% represent Medium Quality, and 75% and above represent high Quality.*
